# Supplementary material for: Prospective, observational study to assess the performance of CAA measurement as a diagnostic tool for the detection of Schistosoma haematobium infections in pregnant women and their child in Lambaréné, Gabon: study protocol of the freeBILy clinical trial in Gabon
Source: Springer Nature journal article supplement (doi:10.1186/s12879-020-05445-1), 2020-09-29
Supplement: MOESM1 [file 18429484]

Additional file 1: Overview of study visits over time with respect to the study phase and details of sample collection

| Timeline:   |                | Baseline                                                         | W1 | W2 | W3                                                              | W4 | W5 | W6  | W7  |     | D   | D+7                                          | Q2 | Q3 | Q4 | Q5 | Q6 | Q7 | Q8 | CO |    |   |  |
|-------------|----------------|------------------------------------------------------------------|----|----|-----------------------------------------------------------------|----|----|-----|-----|-----|-----|----------------------------------------------|----|----|----|----|----|----|----|----|----|---|--|
|             |                | PREGNANCY (pregnant woman followed up)                           |    |    |                                                                 |    |    |     |     |     |     | POST-DELIVERY (mother and child followed up) |    |    |    |    |    |    |    |    |    |   |  |
| Visit name: |                | Sub-study A (sensitivity and specificity of the UCP-LF-CAA test) |    |    |                                                                 |    |    |     |     |     |     |                                              |    |    |    |    |    |    |    |    |    |   |  |
|             |                | A1                                                               | A2 | A3 | A4                                                              |    |    |     |     |     |     | A5                                           | A6 |    |    |    |    |    |    |    |    |   |  |
|             |                |                                                                  |    |    | Sub-study B (CAA levels)                                        |    |    |     |     |     |     |                                              |    |    |    |    |    |    |    |    |    |   |  |
|             |                |                                                                  |    |    | B4-B7                                                           | B8 | B9 | B10 | B11 | B12 | B13 |                                              |    |    |    |    |    |    |    |    |    |   |  |
|             |                |                                                                  |    |    | Sub-study C (early <i>S. haematobium</i> infections in infants) |    |    |     |     |     |     |                                              |    |    |    |    |    |    |    |    |    |   |  |
|             |                |                                                                  |    |    |                                                                 |    |    |     |     |     |     |                                              | C1 | C2 | C3 | C4 | C5 | C6 | C7 | C8 | C9 |   |  |
| Mother      | Urine (ml)     | 25                                                               | 25 | 25 | 25                                                              | 25 | 25 | 25  | 25  | 25  | 25  | 15                                           | 15 | 15 | 15 | 15 | 15 | 15 | 15 | 15 |    |   |  |
|             | Blood (ml)     | 10                                                               |    |    |                                                                 |    |    |     |     |     |     |                                              |    |    |    |    |    |    |    |    |    |   |  |
|             | -Serum (ml)    | 5                                                                |    |    |                                                                 |    |    |     |     |     |     |                                              |    |    |    |    |    |    |    |    |    |   |  |
|             | -EDTA (ml)     | 5                                                                |    |    |                                                                 |    |    |     |     |     |     |                                              |    |    |    |    |    |    |    |    |    |   |  |
|             | Stool          | X                                                                |    |    |                                                                 |    |    |     |     |     | X   |                                              |    |    |    |    |    |    |    |    |    |   |  |
|             | PZQ (40 mg/kg) |                                                                  |    |    | X                                                               |    |    |     |     |     |     |                                              | X  |    |    |    |    |    |    |    |    | X |  |
| C           | Urine (ml)     |                                                                  |    |    |                                                                 |    |    |     |     |     |     |                                              | 5  | 5  | 5  | 5  | 5  | 5  | 5  | 5  | 5  |   |  |

Ch: Child, Tt: Treatment, W: Week, D: Delivery, D+7: Delivery plus 7 days, Q: Quarter (Q1 starts with delivery), CO: Close-out
